# Supplementary material for: Long Non-Coding RNA LINC02802 Regulates In Vitro Sprouting Angiogenesis by Sponging microRNA-486-5p
Source: MDPI journal article supplement (doi:10.3390/ijms23031653), 2022-01-31
Supplement: s1 [file s1]

**A**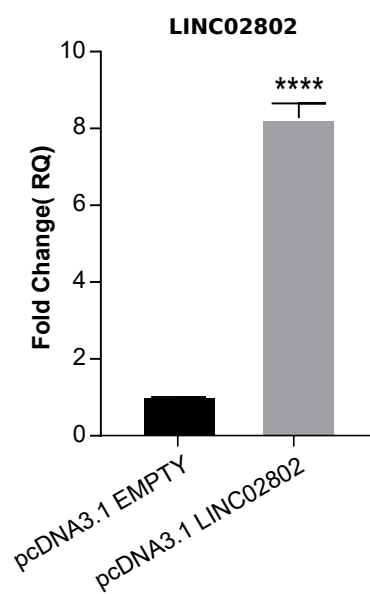**B**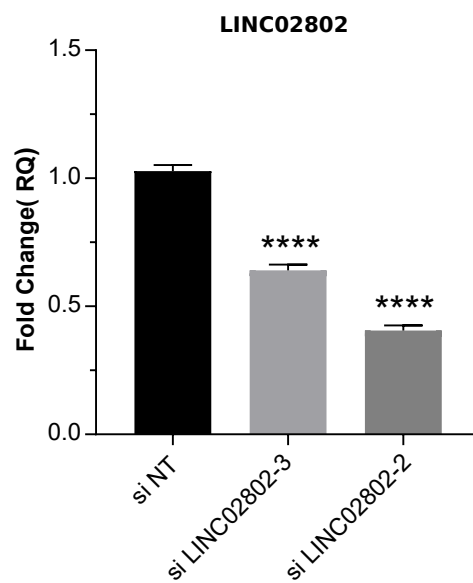**C**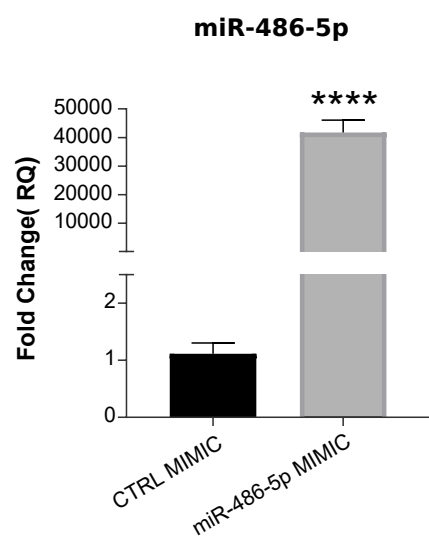**D**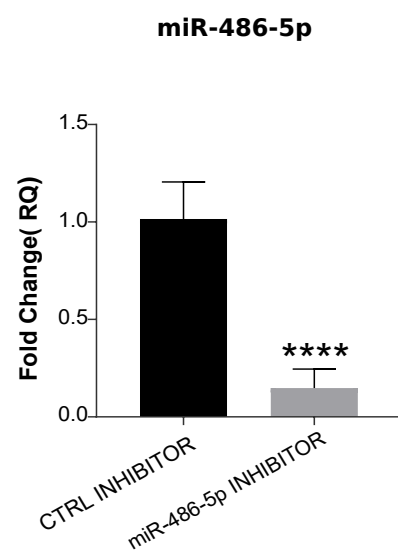**E**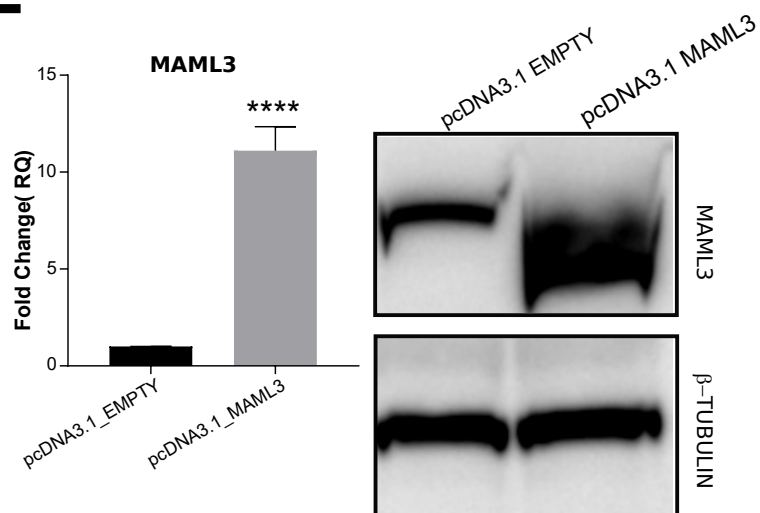**F**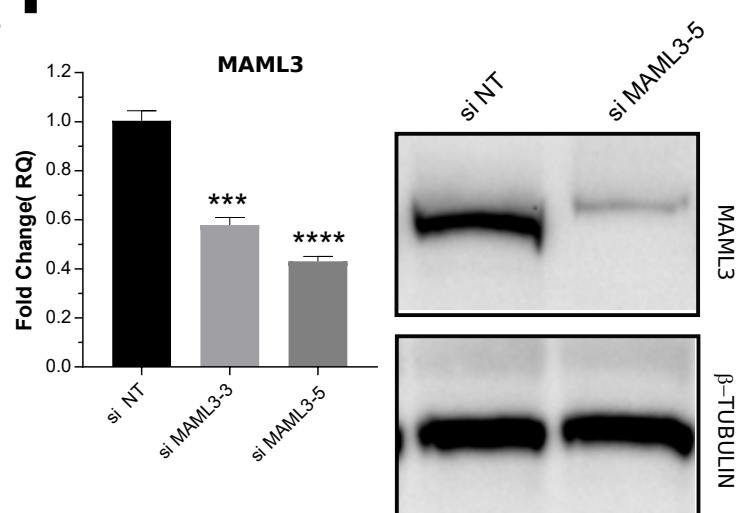

**Supplementary Figure S1: Validation of efficiency of over-expression and knockdown.** (A) The effectiveness of over-expression of LINC02802 and (B) knockdown confirmed by real-time PCR. Data are representative of n = 3 experiments; \*\*\*\*, p<0.0001 confirmed by RT-qPCR (C-D) The effectiveness of over-expression and knockdown of mir-486-5p respectively. Data are represented as mean  $\pm$  SEM from n = 3 experiments; \*\*\*\*, p<0.0001; \*\*\*, p<0.001; \*\*, p<0.01; \*, p<0.05. (E) RT-qPCR and western blot analysis of MAML3 expression in ECs transfected with pcDNA3.1\_MAML3. (F) RT-qPCR and western blot analysis of MAML3 expression in ECs transfected with siRNA against MAML3. Si MAML3-5 resulted in a lower level of MAML3 expression was selected for the following validations. Data are represented as mean  $\pm$  SEM from n = 3 experiments; \*\*\*\*, p<0.0001. Blot are representative of 3 experiments done with similar results.
