# Supplementary material for: Long Non-Coding RNA LINC02802 Regulates In Vitro Sprouting Angiogenesis by Sponging microRNA-486-5p
Source: Int J Mol Sci. 2022 Jan 31;23(3):1653. doi: 10.3390/ijms23031653 (PMC8836176; doi:10.3390/ijms23031653)
Supplement: Supplementary file 1 [file ijms-23-01653-s001.zip]

Archive with 4 entries (4 files):
- SUPPLEMENTARY/Figure supplementary1.pdf
- SUPPLEMENTARY/Supplemantary material 1 lncRNAs differentially expressed.xltx
- SUPPLEMENTARY/Supplemantary material 2 microRNAS differentially expressed.xltx
- SUPPLEMENTARY/Supplemantary material 3 hsa-miR-486-5p target.xltx
