# Supplementary material for: Long Non-Coding RNA LINC02802 Regulates In Vitro Sprouting Angiogenesis by Sponging microRNA-486-5p
Source: Int J Mol Sci. 2022 Jan 31;23(3):1653. doi: 10.3390/ijms23031653 (PMC8836176; doi:10.3390/ijms23031653)
Supplement: Supplementary file 1 [file ijms-23-01653-s001.zip › SUPPLEMENTARY/Supplemantary material 1 lncRNAs differentially expressed.xltx]

## Sheet: Supplemantary material 1 lncRNA
Gene_ID	Gene.name	Gene.start..bp.	Gene.end..bp.	Chromosome.scaffold.name	Strand	baseMean	log2FoldChange	pvalue	padj
ENSG00000182165	TP53TG1	87325225	87345515	7	-1	435.6803139447	1.6762954371	6.21013788999502E-08	0.000001885
ENSG00000185904	LINC00839	42475543	42495336	10	1	172.9222392266	1.1497708024	0.0016066014	0.0117217189
ENSG00000197180	CH17-340M24.3	154424380	154428479	X	-1	56.7325785062	1.3562318538	0.0033544931	0.0206651659
ENSG00000197291	RAMP2-AS1	42753914	42761257	17	-1	71.3941961713	1.2741179618	0.0045916229	0.0264108453
ENSG00000198221	AFDN-DT	167823876	167826709	6	-1	26.063765999	2.6839471716	5.42802263402718E-05	0.0007232321
ENSG00000203930	LINC00632	140709767	140772679	X	1	16.9655477465	3.2353213437	0.0058004143	0.0313519635
ENSG00000205106	DKFZp779M0652	45771432	45772358	11	1	4.8957455665	4.7649581224	0.0063164696	0.0335643015
ENSG00000213888	LINC01521	31346777	31348719	22	1	23.6134523385	-2.408282302	0.0003896626	0.0037211101
ENSG00000214548	MEG3	100779410	100861031	14	1	5311.3189302683	1.2687237458	0.000001092	2.42618340954227E-05
ENSG00000223403	MEG9	101069911	101072937	14	1	97.5839522743	1.7672456351	2.81188761731168E-05	0.0004202448
ENSG00000225194	LINC00092	96019732	96027965	9	-1	4.7384701227	4.7158878989	0.007515804	0.0384252121
ENSG00000225783	MIAT	26646428	26676475	22	1	49.8731104122	3.5804503875	2.63397415168837E-07	6.83684505665654E-06
ENSG00000226029	LINC01772	16460948	16468481	1	1	16.659701076	2.3473737468	0.0095318498	0.0459735875
ENSG00000226051	ZNF503-AS1	75269819	75373500	10	1	5.3655569818	4.9091264719	0.0046032884	0.0264514474
ENSG00000226137	BAIAP2-AS1	81029130	81034881	17	-1	694.386740252	0.7058160486	0.0033729567	0.0207444819
ENSG00000226197	AL583785.1	13446491	13487511	9	1	6.3251086309	3.6782908888	0.0087536861	0.0432389506
ENSG00000227502	LINC01268	113868013	113873351	6	-1	20.9176449056	3.2704728771	2.21511389706063E-05	0.0003443345
ENSG00000227740	AL513329.1	175904762	175920513	1	-1	11.5337064768	6.0335490483	8.08645003243815E-05	0.001015468
ENSG00000228106	AL392172.1	222815022	222837384	1	1	89.6525373431	1.1243449563	0.0008543566	0.0070681754
ENSG00000229855	AC008568.1	121199704	121357398	5	1	254.9885019942	-1.3567614035	0.0001564866	0.0017655328
ENSG00000230724	LINC01001	127204	139612	11	-1	43.224022519	-1.420524511	0.0045164878	0.0260695371
ENSG00000231507	LINC01353	203287152	203288801	1	1	21.0578953081	1.9515918386	0.0061560036	0.0329215801
ENSG00000232527	LINC02802	144227030	144250288	1	-1	200.2637284737	1.3504898057	0.0012710867	0.0097385698
ENSG00000232774	FLJ22447	61570540	61658696	14	1	23.8015451617	1.96306881	0.0039092282	0.0232157446
ENSG00000232931	LINC00342	95807118	95816215	2	-1	271.9770125251	1.2463235162	0.0003699326	0.0035695172
ENSG00000235884	LINC00941	30795681	30802711	12	1	75.0949236629	-1.0691755857	0.0026019159	0.0170299791
ENSG00000235888	AF064858.1	38988707	39006153	21	-1	9.1350981015	4.809624939	0.0005162193	0.0046930048
ENSG00000236022	AC106017.1	19203825	19214045	17	1	26.5111015557	2.4346730045	0.0025565868	0.0168258146
ENSG00000240350	AC017002.3	111491273	111570974	2	1	7.5639148175	3.4928182744	0.0104037351	0.0491266201
ENSG00000242375	AL590705.3	97195351	97197687	9	-1	42.2506878471	1.6598068917	0.00414744	0.0243355425
ENSG00000245937	LINC01184	127940426	128083172	5	-1	384.260621666	0.9766281447	0.000014432	0.0002404949
ENSG00000247095	MIR210HG	565660	568457	11	-1	57.5929003217	2.2350122618	5.86264539271104E-06	0.0001078313
ENSG00000250303	AP002884.3	112270749	112362534	11	1	106.7116955678	-1.4929263644	0.0001242678	0.0014593066
ENSG00000250786	SNHG18	9546200	9550609	5	1	46.8593310442	2.3632150137	7.59248546641977E-07	0.000017548
ENSG00000250899	AC125807.2	3041437	3044950	12	1	178.8488677309	-2.0200753613	1.14127892450277E-06	2.52231724110268E-05
ENSG00000251432	AC108062.1	128292751	128519394	4	1	29.0710583215	2.031208588	0.0072401408	0.037293546
ENSG00000251580	LINC02482	6670725	6673830	4	-1	44.6657846404	1.3793190958	0.0089681948	0.0440324097
ENSG00000253669	GASAL1	102805517	102809971	8	1	30.7187039518	-2.0069945636	0.0009925895	0.0079598227
ENSG00000254486	LINC02547	12030875	12061785	11	1	41.0256934254	-1.5736786695	0.0014978007	0.0110836573
ENSG00000254639	AC116021.1	46238382	46239267	11	1	6.4114427671	-5.0860168628	0.0026325531	0.0171589969
ENSG00000255874	LINC00346	110863987	110870251	13	-1	116.5330579866	-1.1139414274	0.0009070251	0.0074091498
ENSG00000257595	LINC02356	111369282	111403310	12	1	5.0781291838	4.8191554271	0.0049950236	0.0281206326
ENSG00000258610	AF111169.2	76778952	76782249	14	1	89.1362625512	1.9214368724	9.719250420107E-05	0.0011891453
ENSG00000260025	AC009414.2	36354749	36355114	2	-1	96.7118989391	1.1319622833	0.0103379753	0.048940915
ENSG00000260077	AC104794.2	10039092	10040663	2	-1	68.320971904	1.3665620627	0.0009194632	0.0074932463
ENSG00000260807	AC009041.2	975761	981596	16	-1	141.8674068564	1.3117024651	6.09344823420078E-05	0.0007970269
ENSG00000267100	ILF3-AS1	10651862	10653844	19	-1	386.8051134096	-1.008003654	0.001041023	0.0083002908
ENSG00000267107	PCAT19	41454169	41500649	19	-1	1741.2595519004	0.5893194796	0.0010614617	0.0084309807
ENSG00000267374	AC016205.1	39206924	39800318	18	-1	23.4148927901	-2.2194829554	0.0079712069	0.040227799
ENSG00000267583	AC007998.3	35443869	35467088	18	-1	564.9162528891	1.2086982531	1.05214368620272E-06	2.34397358113397E-05
ENSG00000268471	LINC02486	152536264	152539263	4	1	64.7347970395	-1.3633329627	0.0055209154	0.0302136403
ENSG00000268568	AC007228.2	56672574	56673901	19	-1	16.0758635206	2.420644945	0.0084937434	0.0422506687
ENSG00000268713	AC005261.4	57261354	57262738	19	1	111.8044172301	1.3557375901	0.0001166816	0.0013878535
ENSG00000269155	AL009178.2	167795530	167798248	6	1	25.0833972122	3.4435072624	2.51649001517185E-05	0.0003835032
ENSG00000269930	AC091057.2	30616958	30617749	15	1	59.026805554	1.2104178662	0.0049794184	0.0280612204
ENSG00000269974	AC091057.3	30648797	30649529	15	1	22.1948763192	-2.1493751434	0.0043879387	0.0254686903
ENSG00000270164	LINC01480	41535183	41536904	19	1	8.1450197703	3.3089435436	0.006875423	0.0357407889
ENSG00000270547	LINC01235	13406380	13433053	9	-1	382.9623778566	-0.6640499334	0.0100705282	0.0479883562
ENSG00000271020	AC112220.2	33797149	33797681	3	-1	24.6212051236	-2.0737100066	0.0082226428	0.041172512
ENSG00000271334	LINC02104	39520431	39524708	5	1	47.3867120744	1.223119151	0.0086847669	0.0429955304
ENSG00000271538	LINC02427	184506460	184537554	4	-1	6.7041067338	-5.1538399361	0.0025854742	0.0169757059
ENSG00000272086	AC025181.2	32174471	32175272	5	1	35.1564554929	1.3358369147	0.0077450384	0.0393365805
ENSG00000272138	LINC01607	79768142	79802842	8	1	6.7434591282	4.3597155699	0.0031079268	0.0194847599
ENSG00000272168	CASC15	21664772	22368328	6	1	474.7454151161	1.3487177457	1.29002906465103E-05	0.0002178019
ENSG00000272275	AC092687.3	10767875	10770058	2	-1	11.3592774902	4.1079325451	0.000317826	0.0031544086
ENSG00000272695	GAS6-AS2	113864168	113866833	13	1	27.6674743525	1.815644117	0.0036933583	0.0222172402
ENSG00000272755	AC245297.2	149264252	149264816	1	1	8.0500256105	4.0415340547	0.0022359961	0.0151774494
ENSG00000274225	AP001065.1	44477850	44478493	21	1	8.6450825356	4.0663730214	0.0025866232	0.0169765612
ENSG00000274561	AC005332.6	68131462	68131907	17	1	33.0630850918	1.8179779508	0.0011870619	0.0092738863
ENSG00000275198	AL512791.2	90383365	90387973	14	1	23.5429119786	-2.0239171311	0.0049069317	0.0277930496
ENSG00000275512	AC007998.4	35403996	35406528	18	-1	32.231864529	2.0641486356	0.0007468163	0.0063429898
ENSG00000276855	AC015922.4	15789016	15789705	17	1	52.8147081562	2.1284819455	8.80015016274417E-06	0.0001546896
ENSG00000277013	AC008556.1	33906352	33908391	19	1	167.4104301528	-0.8474172603	0.0081058785	0.0406946234
ENSG00000277232	GTSE1-AS1	46295143	46296660	22	-1	13.6644290926	-3.1812067238	0.0006039691	0.0053506335
ENSG00000278727	AC000403.1	76887551	76891135	13	1	143.2705374932	-1.3175741311	0.000392617	0.003743568
ENSG00000280721	LINC01943	87439523	87459044	2	-1	40.846506511	4.2734767396	8.3673653334898E-10	3.71823402446064E-08
ENSG00000281404	LINC01176	30390885	30412375	7	1	8.9366442747	3.0583364726	0.0102683368	0.0486789935
ENSG00000283196	AC006453.2	89542842	89585652	2	-1	562.6922995815	1.0737618571	0.0001704091	0.0018918701
