# Supplementary material for: Long Non-Coding RNA LINC02802 Regulates In Vitro Sprouting Angiogenesis by Sponging microRNA-486-5p
Source: Int J Mol Sci. 2022 Jan 31;23(3):1653. doi: 10.3390/ijms23031653 (PMC8836176; doi:10.3390/ijms23031653)
Supplement: Supplementary file 1 [file ijms-23-01653-s001.zip › SUPPLEMENTARY/Supplemantary material 2 microRNAS differentially expressed.xltx]

## Sheet: Supplemantary material 2 microR
miRNA_ID	baseMean	log2FoldChange	pvalue	padj
hsa-let-7a-3p	125.776198816406	0.905676881620793	0.000913762327526798	0.00620126343624928
hsa-let-7c-3p	85.4631260198212	-0.928262884931531	0.000298576350298167	0.00234207942311809
hsa-let-7d-3p	823.531491643231	-0.663087862779645	7.42866331008244e-05	0.000723695586982225
hsa-let-7e-3p	119.162173041692	-0.973932194807621	2.64925058695164e-05	0.000296323584170147
hsa-let-7e-5p	11270.0929629247	0.565028564816016	0.000270999559878613	0.0021930693174296
hsa-let-7f-1-3p	115.14121583937	-0.644399360650363	0.0115962236326648	0.0489798536652414
hsa-miR-100-3p	2091.24738865589	-1.24624545713968	3.39096652268263e-08	7.58571770259374e-07
hsa-miR-100-5p	205327.029379037	-0.526181459150117	0.00213813178672503	0.0122993485636373
hsa-miR-101-3p	1668.26086662859	0.69695764113999	6.77491179261901e-06	8.35111576069772e-05
hsa-miR-10400-5p	80.28110259151	1.95053774771845	6.94288539982382e-13	5.24187847686698e-11
hsa-miR-1246	563.147326214118	4.42923905545725	1.15753301601415e-64	6.99149941672544e-62
hsa-miR-1257	66.9083028352984	-1.33898199287855	3.47867203176884e-06	4.88632071439158e-05
hsa-miR-125a-5p	21229.3461801247	-1.46599068984322	1.68455590523442e-11	1.01747176676159e-09
hsa-miR-125b-1-3p	4290.2224354734	-0.53216443304342	0.00267286966810247	0.0144144042815526
hsa-miR-125b-2-3p	522.655121555883	0.571944685553739	0.000132782821988976	0.00117942388943149
hsa-miR-125b-5p	10194.7743048958	-1.0208843187952	2.37186772355854e-08	5.51003117318985e-07
hsa-miR-1260a	2173.15590329355	-0.84099806039179	3.59961984693995e-05	0.000381433401324864
hsa-miR-127-5p	118.996921536884	0.664353626661616	0.00504881531129305	0.0252023508100909
hsa-miR-128-1-5p	206.788608596677	-1.3586663286212	1.5536258483063e-09	4.93889480198423e-08
hsa-miR-1290	12.6782272890047	4.12546834147059	2.35342517770253e-06	3.46699709105446e-05
hsa-miR-1304-3p	1038.26602169067	-0.612983518003507	0.00335745152377896	0.0176339193074999
hsa-miR-130b-5p	151.148821977086	-1.9706427710843	5.45237989636862e-14	5.48872909567774e-12
hsa-miR-136-5p	278.557968655512	0.538182424563973	0.0104802284183101	0.0448940281181511
hsa-miR-146b-5p	150.401935720911	0.955024817873565	0.000110646550792464	0.00101258358604013
hsa-miR-148a-3p	11929.5079277247	0.605686165900126	0.00247473038522515	0.013521321767939
hsa-miR-154-5p	75.546332230358	0.855983360750874	0.00611751336313259	0.0297982102526781
hsa-miR-16-2-3p	63.6776093090715	-1.27147785342009	3.10031754989149e-05	0.000340471236388084
hsa-miR-17-5p	3466.72346334157	-0.847470396970768	1.68310225177851e-08	4.06637504029688e-07
hsa-miR-181a-3p	7833.94512929313	-0.780359841700516	9.3675491659651e-08	1.94625695526806e-06
hsa-miR-181a-5p	248417.62405926	0.617294942936459	0.00020934304708122	0.0017808901470008
hsa-miR-181b-3p	203.389208081089	-0.828260679116815	5.01164671935015e-05	0.000504505769747915
hsa-miR-181c-3p	160.069748582168	0.557730511027412	0.00707174575425213	0.0333698002778773
hsa-miR-181c-5p	1090.03767587376	0.901099692754755	1.53406629433695e-07	2.98895497348231e-06
hsa-miR-181d-5p	915.937266715467	0.501415379860991	0.00398848256399526	0.0204156226157045
hsa-miR-182-5p	478.937122906065	0.500942972387012	0.00817405292508444	0.0374024845965985
hsa-miR-184	60.8579633608542	-5.76803287568984	9.00920261361684e-06	0.000106697223110286
hsa-miR-18a-3p	148.390706576579	-1.39673175994198	1.45296329514429e-08	3.65662429277979e-07
hsa-miR-1908-3p	61.4968784316395	3.72755391059465	7.0058689576365e-22	1.05788621260311e-19
hsa-miR-1910-5p	175.013544914079	-1.84422063554222	6.75969972209495e-16	8.16571726429069e-14
hsa-miR-191-3p	76.7924555062797	-1.84308376690414	1.99896415074874e-09	6.03687173526118e-08
hsa-miR-195-3p	154.023597690808	-0.954264943522641	7.68572797468917e-06	9.28435939342451e-05
hsa-miR-19b-3p	8780.38103579415	0.712100158916202	0.00106154933592852	0.00696930216196549
hsa-miR-210-3p	960.151843467297	2.12595473909829	7.4999587306943e-23	1.50999169111312e-20
hsa-miR-216b-5p	24.8608130489263	-1.57145268000308	0.000251066244968116	0.00207731523233893
hsa-miR-219a-1-3p	19.1354180183953	-1.26711515355436	0.0087920796066172	0.039047177076447
hsa-miR-222-3p	2380.17400739287	0.595471196706708	6.81176405629163e-05	0.000674476309836089
hsa-miR-222-5p	425.238931338525	-1.88829252698404	0.0017496014574264	0.0105235050808861
hsa-miR-23a-3p	6000.65374045257	0.519858026073647	0.00163244016491017	0.00995953393541154
hsa-miR-24-3p	1737.98961493227	0.661939204176759	4.63819268638531e-06	6.09014865777549e-05
hsa-miR-2682-5p	116.8532121366	-0.735931573169766	0.00233652101426503	0.0131893335758512
hsa-miR-26a-2-3p	29.5301164167011	-1.00042220332843	0.00931804708381856	0.0407833365117856
hsa-miR-26b-5p	1254.01710960353	0.54136316061524	0.000250509661698021	0.00207731523233893
hsa-miR-27a-5p	1344.74106411495	-0.821706436561834	1.79608486365976e-06	2.93198718283918e-05
hsa-miR-27b-3p	181774.573145177	0.99794074133714	2.23436592219337e-09	6.42646198573713e-08
hsa-miR-27b-5p	1350.9966557146	-0.936013192587974	3.58672565539954e-10	1.20354571992296e-08
hsa-miR-299-3p	819.514831364247	0.530329978539204	0.000282262312500679	0.00224324258882118
hsa-miR-3074-5p	1085.07677637995	0.7514134198779	3.33874077400192e-07	6.11090735605199e-06
hsa-miR-30a-5p	6472.10830833518	0.616102889393711	1.90016509509106e-06	2.99781063282202e-05
hsa-miR-30e-5p	122.183009208395	0.610381069308067	0.00469596534408288	0.0238349837632442
hsa-miR-3117-3p	16.6342855135966	2.13077101900837	0.000272318209945729	0.0021930693174296
hsa-miR-31-3p	21.0464394460028	1.58650162974868	0.00096581513826424	0.00648169270568445
hsa-miR-3152-5p	94.747035122274	-1.46259761199179	7.370658072907e-07	1.27196499315309e-05
hsa-miR-3184-3p	13003.4608905606	0.540811755806503	0.00067508585444115	0.00479708065979358
hsa-miR-320a-3p	10414.2659970523	0.645128720540065	2.72734637274427e-06	3.92218383127985e-05
hsa-miR-320b	1642.22256856	1.10109268845495	4.50014050825129e-11	2.09083451306445e-09
hsa-miR-320c	68.5930948890967	1.18348804560028	4.68868832586934e-05	0.000479994533699166
hsa-miR-320d	25.6203646285051	1.3481009481351	0.00114730511408135	0.00737204562665036
hsa-miR-324-3p	222.676134227372	-0.569877354571377	0.00559893917481392	0.0274939777364846
hsa-miR-329-3p	113.641912764332	1.07606283449485	8.17368138467227e-05	0.000783635485133659
hsa-miR-331-3p	224.702213671714	-0.627090854719604	0.00240938847747377	0.0134747281517977
hsa-miR-335-3p	1330.39618976052	-1.65645728635594	0.000315465774101654	0.00244283753278717
hsa-miR-339-3p	885.565880930658	-0.694416793166618	3.26765415219901e-05	0.000352439840701464
hsa-miR-33b-3p	65.3370648290255	-1.42257536801115	4.80205216199583e-07	8.53070442895731e-06
hsa-miR-33b-5p	288.460755917971	0.824929082061768	0.000200817844365124	0.00173277111423621
hsa-miR-3605-3p	14.2641392758558	-4.109993232237	1.95101613682913e-07	3.68254295826499e-06
hsa-miR-3614-5p	39.696930373711	-1.70007575846577	4.23531176008369e-06	5.81392796156942e-05
hsa-miR-365a-3p	136.38993762113	-1.17222272004475	5.34956976084573e-08	1.15397861983958e-06
hsa-miR-365b-3p	121.914422795932	-1.08792173598631	4.54716542026939e-06	6.09014865777549e-05
hsa-miR-374b-3p	188.73554728121	-0.668260841897989	0.000468629329175335	0.00349447055335682
hsa-miR-374b-5p	358.134641410238	0.766465976686978	8.59936409513871e-05	0.000811564986478716
hsa-miR-374c-3p	356.948189524716	0.919311101204558	1.9356724284778e-06	2.99781063282202e-05
hsa-miR-376a-3p	190.124798064317	0.54348048023856	0.00873132188110856	0.039047177076447
hsa-miR-380-3p	101.660491754943	-0.678207955719499	0.0114631585690364	0.0487587871528027
hsa-miR-382-3p	162.102299945779	0.62903958751562	0.00851141555879252	0.0383648880411245
hsa-miR-3960	59.856853603266	2.2874884662661	2.92737667153188e-11	1.47344625800438e-09
hsa-miR-411-3p	245.047393033196	-0.591031066690815	0.00116541005515088	0.00740955445590665
hsa-miR-423-3p	13856.6356402608	-1.05682736276772	2.77499746686304e-11	1.47344625800438e-09
hsa-miR-423-5p	12953.888190724	0.520319284152576	0.000843732033738325	0.00592574591137149
hsa-miR-424-5p	3771.3496342466	0.83374961464834	0.00060444667293222	0.00434625941013167
hsa-miR-431-5p	803.787744228645	-0.659830471409091	4.06969275356642e-05	0.000423809383302434
hsa-miR-4435	70.9470056657951	-0.917377276161471	0.000883983447705377	0.00606734093652327
hsa-miR-4448	503.439248870794	-1.15730317422632	9.9298950171785e-09	2.60767677842427e-07
hsa-miR-4485-3p	97.3280047493226	-0.900444026435765	0.00175972518736671	0.0105235050808861
hsa-miR-449c-5p	12.2262779439534	1.7508605017892	0.00326848425778177	0.017317232383335
hsa-miR-454-5p	160.162152743388	-0.738877049913205	0.000559167897147481	0.00406912542020576
hsa-miR-4746-5p	54.0349202282288	-2.22133156539838	1.28096801549089e-10	5.15803120904331e-09
hsa-miR-484	1527.54012457996	-0.951337897328871	2.20224615313084e-06	3.32539169122757e-05
hsa-miR-485-3p	93.448878398957	-0.987376547070402	0.00017228889265347	0.00150815204583617
hsa-miR-486-5p	2896.90196769713	-0.821360540283298	3.56470927293806e-09	9.78674727661178e-08
hsa-miR-494-3p	71.0131121437564	2.00350653504624	3.57222221259277e-10	1.20354571992296e-08
hsa-miR-503-3p	8.7948917160852	-2.3926057656968	0.00145757921282906	0.00898344739335463
hsa-miR-504-5p	11.0948296810795	5.87304955507502	1.22846937455005e-05	0.000142691442736198
hsa-miR-542-3p	259.403841952471	0.567977087065951	0.0100036656198977	0.0434691657152389
hsa-miR-548o-3p	262.168037814924	-0.758373707493632	0.00184553094504573	0.0109284381451728
hsa-miR-551a	65.8378541007339	0.820981293453228	0.00233156582594981	0.0131893335758512
hsa-miR-5701	22.3971968907849	1.2411340872221	0.00745456169220949	0.0349035291635235
hsa-miR-573	16.3857409995871	-2.95908018488645	1.4741302656188e-06	2.47326300120487e-05
hsa-miR-574-5p	679.726423902939	0.671763742428433	0.00085409801327041	0.00592960000017618
hsa-miR-576-3p	63.6586606155965	0.774535283154509	0.00664067155830216	0.0320877249697161
hsa-miR-576-5p	15.2915099986745	-1.71379353247912	0.00202601858176897	0.0118807303241598
hsa-miR-589-3p	163.98062476344	-0.617040401661166	0.00548540787539175	0.0271572652191526
hsa-miR-589-5p	1326.32802334495	-0.648597427364827	9.84270354754954e-05	0.000914614298879988
hsa-miR-596	29.561597848458	3.1808298849386	8.82995899077186e-11	3.80949659316157e-09
hsa-miR-655-3p	40.6051993064166	1.0042657473929	0.00766130220512089	0.0355955887068694
hsa-miR-671-3p	623.243260250292	-1.48786892672421	1.1724786717462e-13	1.01168159676386e-11
hsa-miR-6840-5p	7.32731024301002	-3.0610021106481	0.000995175459935259	0.00660534041539447
hsa-miR-7-1-3p	73.6643465215379	-0.699149002384483	0.00843084583974564	0.0382874502797471
hsa-miR-7704	46.3102335789576	1.19640653254793	0.000543288460192647	0.00400178329215071
hsa-miR-7974	479.629877692725	-3.26006066034335	1.86125451494565e-54	5.62098863513587e-52
hsa-miR-874-3p	511.026091099128	0.676323383220634	0.000124369117153716	0.00112117830986335
hsa-miR-877-5p	142.398675244177	0.876595420591881	0.00037381940102302	0.00285806225592284
hsa-miR-92a-1-5p	443.23905489287	-0.961989410158522	9.66683918179501e-08	1.94625695526806e-06
hsa-miR-92a-3p	162543.812271804	-1.04341266758035	3.1296956579866e-10	1.18146011088994e-08
hsa-miR-92b-3p	12284.9234975618	-1.33119695660049	1.15915423809057e-11	7.77921288674115e-10
hsa-miR-937-3p	24.2058636337496	-1.24592939139411	0.00248487866927356	0.013521321767939
hsa-miR-941	5938.40037275005	-0.762323747555418	1.40574210012942e-05	0.000160201552543051
hsa-miR-942-5p	33.7523940038928	-2.12964654032473	5.61353398952867e-06	7.06369693682358e-05
hsa-miR-10396b-3p	13.6729470783526	3.594787026607	5.12795350031644e-06	6.58996577487474e-05
