# Supplementary material for: Long Non-Coding RNA LINC02802 Regulates In Vitro Sprouting Angiogenesis by Sponging microRNA-486-5p
Source: Int J Mol Sci. 2022 Jan 31;23(3):1653. doi: 10.3390/ijms23031653 (PMC8836176; doi:10.3390/ijms23031653)
Supplement: Supplementary file 1 [file ijms-23-01653-s001.zip › SUPPLEMENTARY/Supplemantary material 3 hsa-miR-486-5p target.xltx]

## Sheet: Supplemantary material 3 hsa-mi
Gene_ID.prot	Gene.name.prot	miRNA_ID	TargetSCAN_context.score
ENSG00000115977	AAK1	hsa-miR-486-5p	91
ENSG00000129968	ABHD17A	hsa-miR-486-5p	97
ENSG00000107362	ABHD17B	hsa-miR-486-5p	99
ENSG00000115091	ACTR3	hsa-miR-486-5p	95
ENSG00000173209	AHSA2	hsa-miR-486-5p	60
ENSG00000100852	ARHGAP5	hsa-miR-486-5p	97
ENSG00000054267	ARID4B	hsa-miR-486-5p	99
ENSG00000114098	ARMC8	hsa-miR-486-5p	98
ENSG00000087152	ATXN7L3	hsa-miR-486-5p	97
ENSG00000095564	BTAF1	hsa-miR-486-5p	98
ENSG00000132640	BTBD3	hsa-miR-486-5p	98
ENSG00000082153	BZW1	hsa-miR-486-5p	80
ENSG00000130813	C19orf66	hsa-miR-486-5p	92
ENSG00000116667	C1orf21	hsa-miR-486-5p	78
ENSG00000182985	CADM1	hsa-miR-486-5p	61
ENSG00000135387	CAPRIN1	hsa-miR-486-5p	95
ENSG00000205476	CCDC85C	hsa-miR-486-5p	81
ENSG00000196776	CD47	hsa-miR-486-5p	64
ENSG00000140937	CDH11	hsa-miR-486-5p	87
ENSG00000135446	CDK4	hsa-miR-486-5p	96
ENSG00000048740	CELF2	hsa-miR-486-5p	95
ENSG00000137161	CNPY3	hsa-miR-486-5p	99
ENSG00000144524	COPS7B	hsa-miR-486-5p	99
ENSG00000137770	CTDSPL2	hsa-miR-486-5p	99
ENSG00000100592	DAAM1	hsa-miR-486-5p	95
ENSG00000057019	DCBLD2	hsa-miR-486-5p	97
ENSG00000132002	DNAJB1	hsa-miR-486-5p	81
ENSG00000168724	DNAJC21	hsa-miR-486-5p	95
ENSG00000088986	DYNLL1	hsa-miR-486-5p	99
ENSG00000156030	ELMSAN1	hsa-miR-486-5p	87
ENSG00000088367	EPB41L1	hsa-miR-486-5p	92
ENSG00000188522	FAM83G	hsa-miR-486-5p	80
ENSG00000164896	FASTK	hsa-miR-486-5p	96
ENSG00000166147	FBN1	hsa-miR-486-5p	94
ENSG00000185070	FLRT2	hsa-miR-486-5p	97
ENSG00000052795	FNIP2	hsa-miR-486-5p	93
ENSG00000150907	FOXO1	hsa-miR-486-5p	97
ENSG00000033327	GAB2	hsa-miR-486-5p	86
ENSG00000165219	GAPVD1	hsa-miR-486-5p	66
ENSG00000090615	GOLGA3	hsa-miR-486-5p	96
ENSG00000164294	GPX8	hsa-miR-486-5p	99
ENSG00000151233	GXYLT1	hsa-miR-486-5p	91
ENSG00000132475	H3F3B	hsa-miR-486-5p	97
ENSG00000128708	HAT1	hsa-miR-486-5p	99
ENSG00000138411	HECW2	hsa-miR-486-5p	86
ENSG00000132376	INPP5K	hsa-miR-486-5p	85
ENSG00000205339	IPO7	hsa-miR-486-5p	86
ENSG00000117139	KDM5B	hsa-miR-486-5p	91
ENSG00000128607	KLHDC10	hsa-miR-486-5p	92
ENSG00000196782	MAML3	hsa-miR-486-5p	97
ENSG00000135341	MAP3K7	hsa-miR-486-5p	99
ENSG00000116141	MARK1	hsa-miR-486-5p	97
ENSG00000130382	MLLT1	hsa-miR-486-5p	72
ENSG00000057935	MTA3	hsa-miR-486-5p	98
ENSG00000101306	MYLK2	hsa-miR-486-5p	97
ENSG00000065518	NDUFB4	hsa-miR-486-5p	91
ENSG00000082641	NFE2L1	hsa-miR-486-5p	98
ENSG00000001167	NFYA	hsa-miR-486-5p	88
ENSG00000204131	NHSL2	hsa-miR-486-5p	79
ENSG00000177463	NR2C2	hsa-miR-486-5p	92
ENSG00000065989	PDE4A	hsa-miR-486-5p	90
ENSG00000145675	PIK3R1	hsa-miR-486-5p	98
ENSG00000137193	PIM1	hsa-miR-486-5p	98
ENSG00000126003	PLAGL2	hsa-miR-486-5p	82
ENSG00000221866	PLXNA4	hsa-miR-486-5p	80
ENSG00000107758	PPP3CB	hsa-miR-486-5p	96
ENSG00000117523	PRRC2C	hsa-miR-486-5p	97
ENSG00000100804	PSMB5	hsa-miR-486-5p	65
ENSG00000171862	PTEN	hsa-miR-486-5p	94
ENSG00000116473	RAP1A	hsa-miR-486-5p	95
ENSG00000153179	RASSF3	hsa-miR-486-5p	98
ENSG00000244462	RBM12	hsa-miR-486-5p	94
ENSG00000076053	RBM7	hsa-miR-486-5p	98
ENSG00000135945	REV1	hsa-miR-486-5p	71
ENSG00000092871	RFFL	hsa-miR-486-5p	99
ENSG00000119729	RHOQ	hsa-miR-486-5p	96
ENSG00000116954	RRAGC	hsa-miR-486-5p	69
ENSG00000163156	SCNM1	hsa-miR-486-5p	57
ENSG00000122545	SEPT7	hsa-miR-486-5p	91
ENSG00000107338	SHB	hsa-miR-486-5p	56
ENSG00000109171	SLAIN2	hsa-miR-486-5p	85
ENSG00000175387	SMAD2	hsa-miR-486-5p	97
ENSG00000108604	SMARCD2	hsa-miR-486-5p	97
ENSG00000177732	SOX12	hsa-miR-486-5p	93
ENSG00000196141	SPATS2L	hsa-miR-486-5p	54
ENSG00000135250	SRPK2	hsa-miR-486-5p	58
ENSG00000136450	SRSF1	hsa-miR-486-5p	92
ENSG00000112081	SRSF3	hsa-miR-486-5p	99
ENSG00000166444	ST5	hsa-miR-486-5p	99
ENSG00000160408	ST6GALNAC6	hsa-miR-486-5p	98
ENSG00000125834	STK35	hsa-miR-486-5p	94
ENSG00000101109	STK4	hsa-miR-486-5p	96
ENSG00000148291	SURF2	hsa-miR-486-5p	57
ENSG00000115183	TANC1	hsa-miR-486-5p	96
ENSG00000101849	TBL1X	hsa-miR-486-5p	91
ENSG00000126062	TMEM115	hsa-miR-486-5p	92
ENSG00000141232	TOB1	hsa-miR-486-5p	99
ENSG00000196428	TSC22D2	hsa-miR-486-5p	97
ENSG00000151239	TWF1	hsa-miR-486-5p	99
ENSG00000086712	TXLNG	hsa-miR-486-5p	98
ENSG00000177889	UBE2N	hsa-miR-486-5p	84
ENSG00000180667	YOD1	hsa-miR-486-5p	71
ENSG00000105939	ZC3HAV1	hsa-miR-486-5p	97
ENSG00000010244	ZNF207	hsa-miR-486-5p	71
ENSG00000168813	ZNF507	hsa-miR-486-5p	65
ENSG00000139651	ZNF740	hsa-miR-486-5p	98
ENSG00000036549	ZZZ3	hsa-miR-486-5p	74
